# Supplementary material for: Insight into the nanomechanical properties under indentation of β-Si3N4nano-thin layers in the basal plane using molecular dynamics simulation
Source: Royal Society of Chemistry journal article supplement (doi:10.1039/c4cp02449d), 2014-07-15
Supplement: c4cp02449d1.pdf [file c4cp02449d1.pdf]

### Supporting information

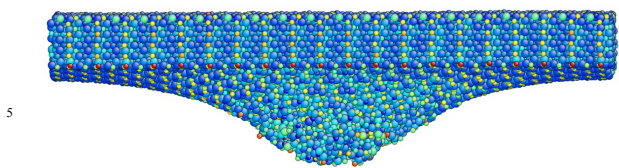

Fig.11 Snapshot of indentation process of five layers of  $\beta$ - $\text{Si}_3\text{N}_4$  films

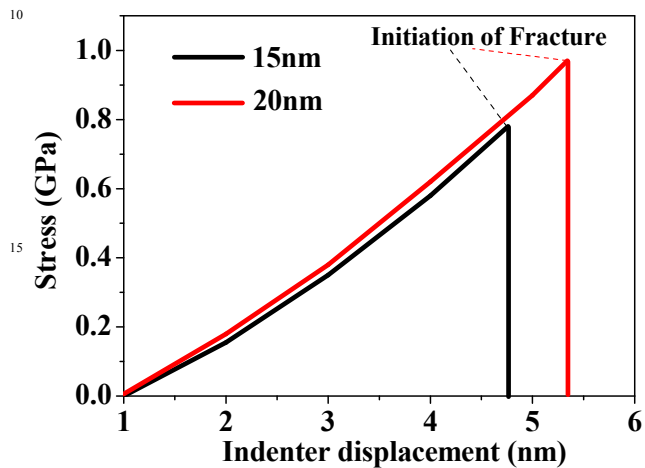

Fig.12 The stress evolution of indenter displacement for the five layer films at 300K and a loading velocity of 0.07 nm/ps with different indenter radii

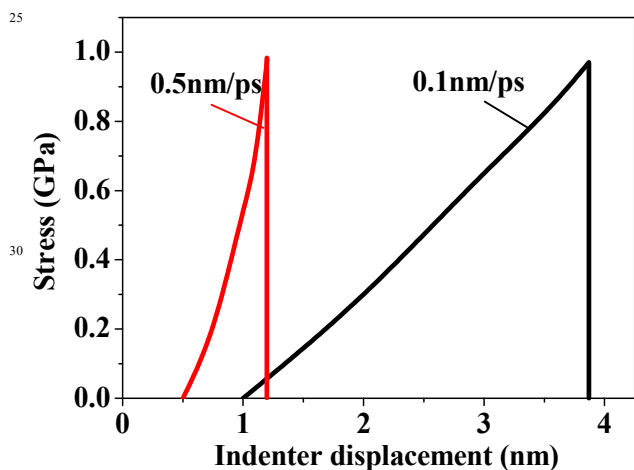

Fig.13 The stress evolution of indenter displacement for the five layer films with an indenter radius of 20nm at 300K and at various indentation velocities

40

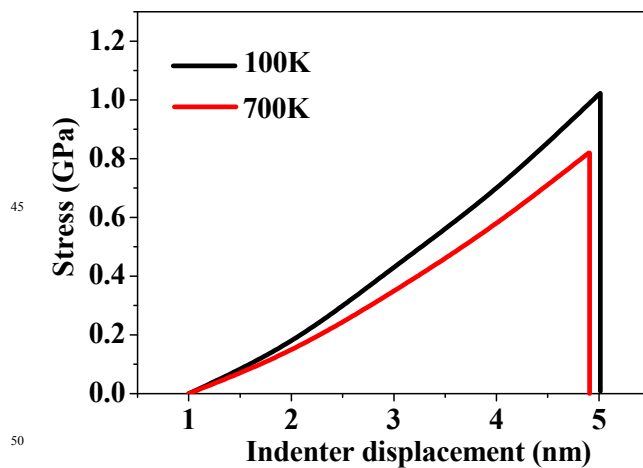

45

50

Fig.14 The stress evolution of indenter displacement for the five layer films with an indenter radius of 17nm and an indentation velocity of 0.07nm/ps at various indentation temperatures

55

20

25

30

35
